# Supplementary material
Source: PubMed Central journal article supplement (PMC7348691)

## CONSORT Diagram

562 Total Patients Received Pneumonectomy Between 2000 and 2018

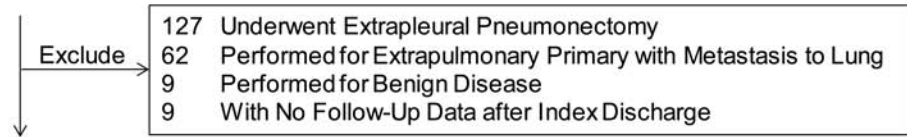

355 Total Patients Received Pneumonectomy for Lung Cancer  
with Follow-Up Data after Index Discharge

Journal Pre-proof

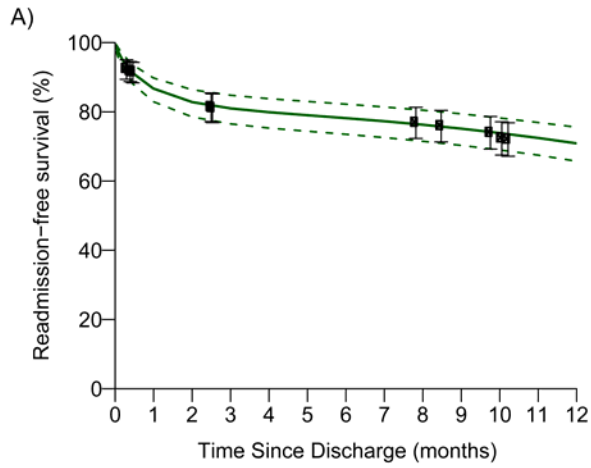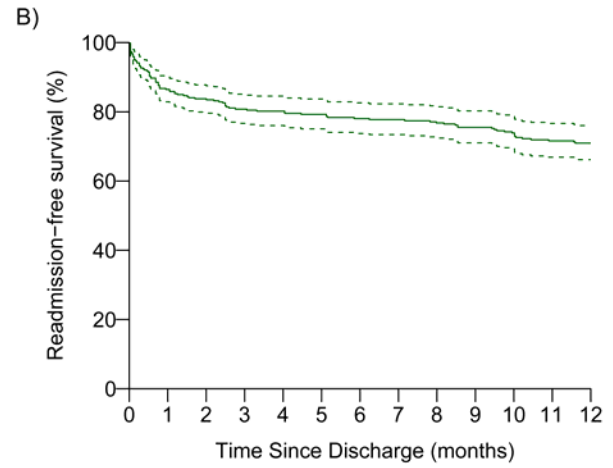

|                    |     |         |         |         |         |         |         |
|--------------------|-----|---------|---------|---------|---------|---------|---------|
| <b>No. At Risk</b> | 342 | 280     | 265     | 254     | 241     | 227     | 210     |
| <b>KM Est</b>      | 100 | 84      | 80      | 78      | 77      | 74      | 71      |
| <b>95% CI</b>      |     | (80,88) | (76,85) | (74,83) | (72,81) | (69,79) | (66,76) |

Journal Pre-proof

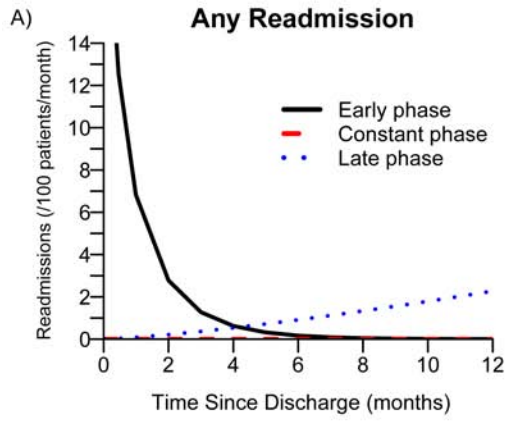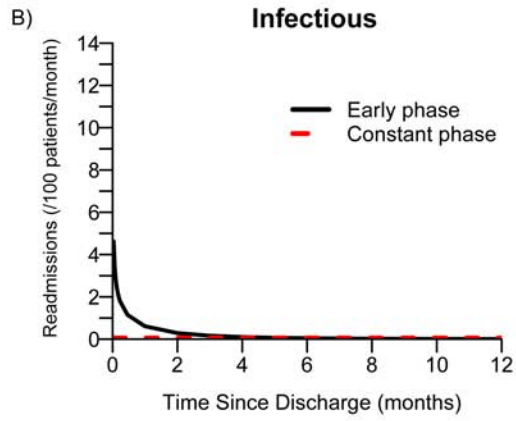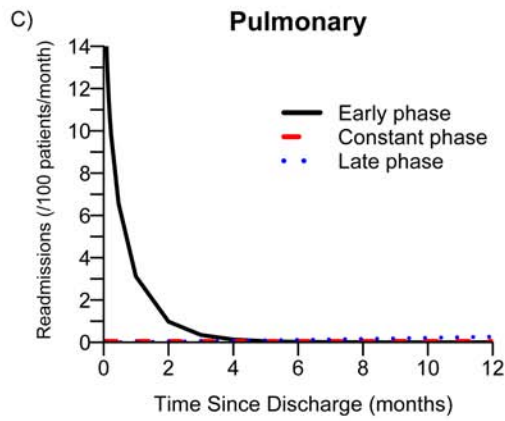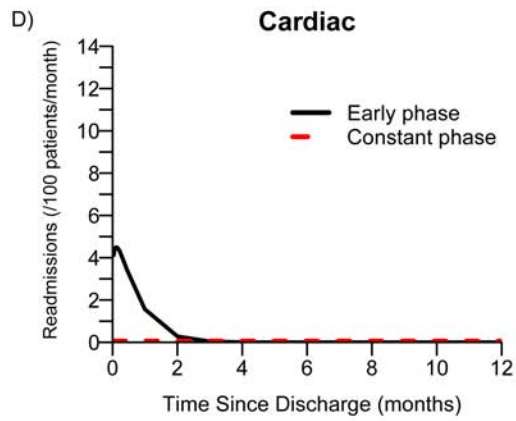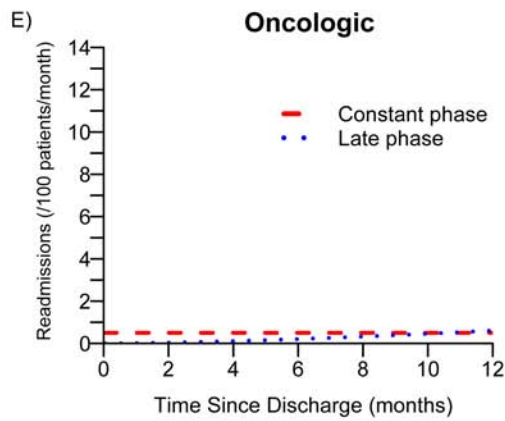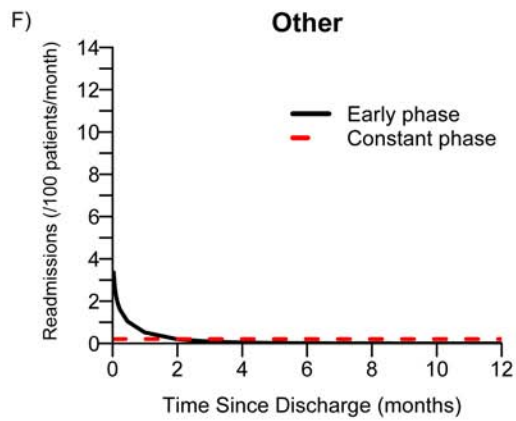

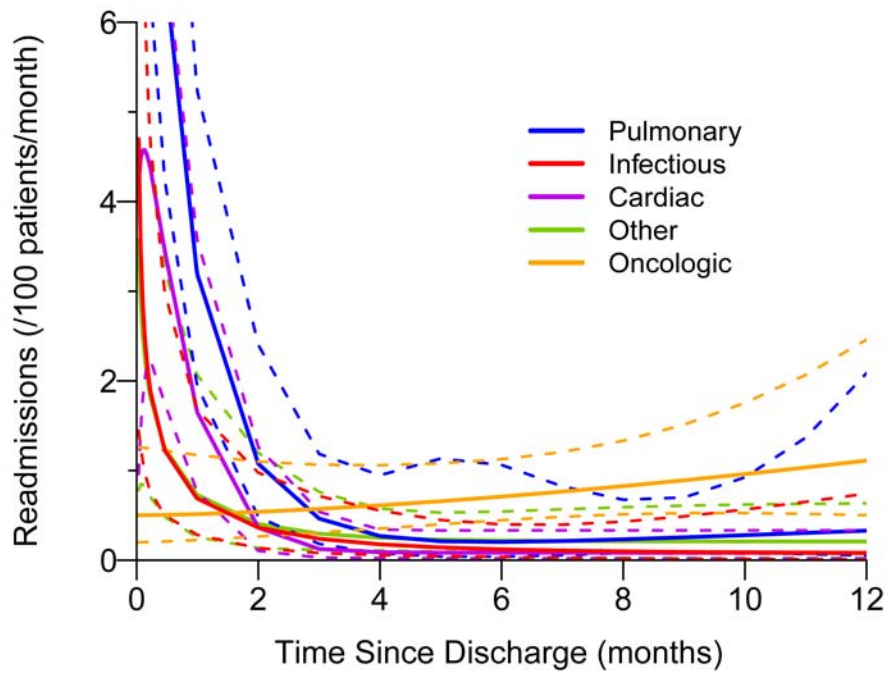

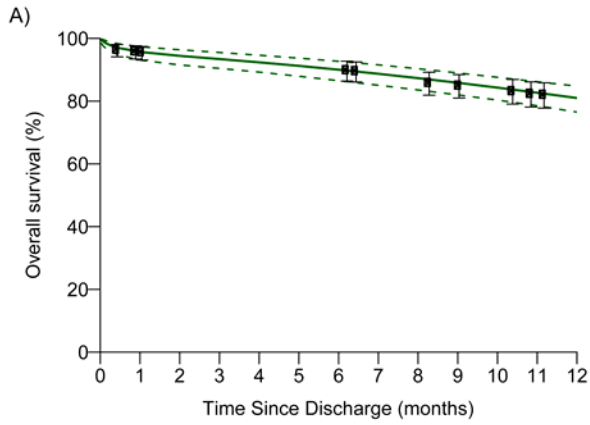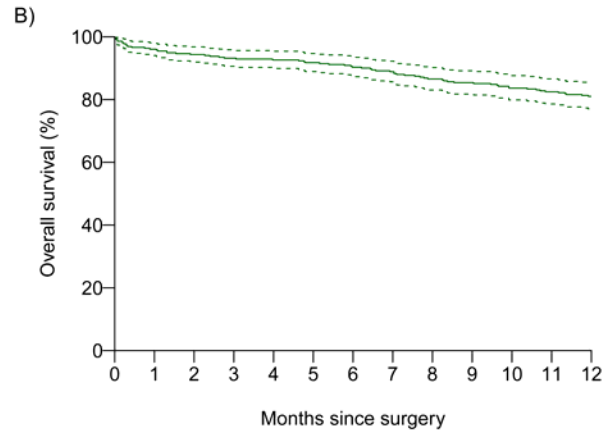

|                    |     | 355 | 329     | 322     | 313     | 299     | 287     | 276     |
|--------------------|-----|-----|---------|---------|---------|---------|---------|---------|
| <b>No. At Risk</b> |     | 355 | 329     | 322     | 313     | 299     | 287     | 276     |
| <b>KM Est</b>      | 100 | 94  | 93      | 90      | 87      | 84      | 81      |         |
| <b>95% CI</b>      |     |     | (92,97) | (90,95) | (87,93) | (83,90) | (80,88) | (77,85) |

Journal Pre-proof

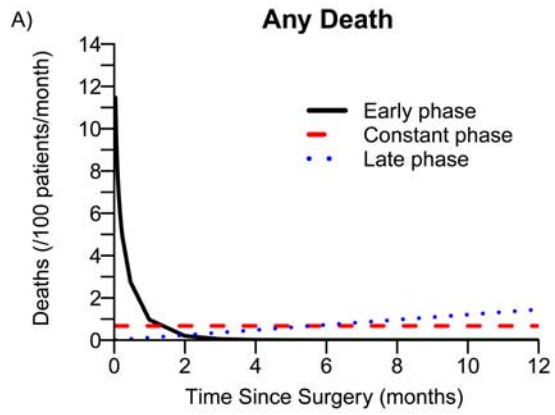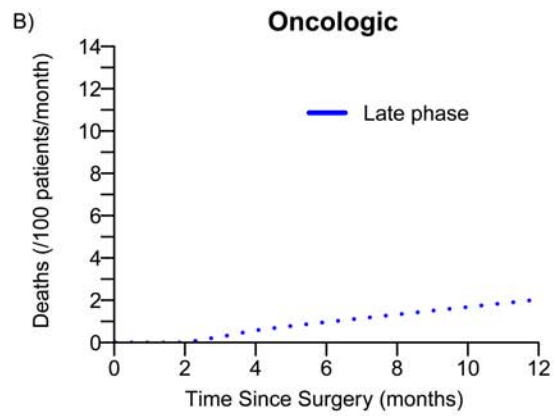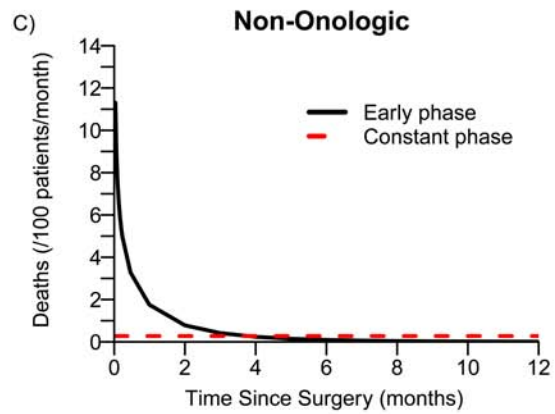

**Supplementary Table 1. Causes of readmission by period**

| <b>Category, Diagnosis</b>                            | <b>0-30 Days<br/>(N=43)</b> | <b>31-90 Days<br/>(N=34)</b> | <b>91 Days-1 Year<br/>(N=45)</b> |
|-------------------------------------------------------|-----------------------------|------------------------------|----------------------------------|
| <b>Pulmonary</b>                                      | 24                          | 16                           | 6                                |
| Bronchopleural fistula                                | 3                           | 9                            | 0                                |
| Chyle leak                                            | 1                           | 0                            | 0                                |
| Chronic obstructive pulmonary disease<br>exacerbation | 0                           | 0                            | 1                                |
| Hemoptysis                                            | 2                           | 0                            | 1                                |
| Hypoxic respiratory failure                           | 2                           | 2                            | 0                                |
| Persistent air leak/pneumothorax                      | 1                           | 0                            | 1                                |
| Pleural effusion                                      | 1                           | 0                            | 0                                |
| Shortness of breath/cough                             | 14                          | 5                            | 3                                |
| <b>Cardiac</b>                                        | 8                           | 6                            | 3                                |
| Arrhythmia                                            | 3                           | 1                            | 0                                |
| Cardiac arrest                                        | 1                           | 2                            | 0                                |
| Congestive heart failure                              | 1                           | 0                            | 0                                |
| Pericardial effusion                                  | 2                           | 2                            | 1                                |
| Pulmonary embolus                                     | 1                           | 0                            | 2                                |
| Syncope                                               | 0                           | 1                            | 0                                |
| <b>Infectious</b>                                     | 5                           | 4                            | 9                                |
| <i>Clostridium difficile</i> colitis                  | 0                           | 1                            | 0                                |
| Pneumonia                                             | 3                           | 2                            | 5                                |
| Urinary tract infection                               | 1                           | 0                            | 1                                |
| Wound infection                                       | 1                           | 1                            | 3                                |
| <b>Other</b>                                          | 4                           | 4                            | 6                                |
| Dehydration                                           | 1                           | 1                            | 1                                |
| Fall                                                  | 0                           | 3                            | 0                                |
| Gastrointestinal bleed                                | 1                           | 0                            | 0                                |
| Other cancer                                          | 0                           | 0                            | 3                                |
| Postoperative pain                                    | 2                           | 0                            | 2                                |
| <b>Oncologic</b>                                      | 2                           | 4                            | 21                               |
| Chemotherapy toxicity                                 | 0                           | 1                            | 0                                |
| Failure to thrive 2/2 advanced disease                | 0                           | 2                            | 9                                |
| Neurologic symptoms/brain metastasis                  | 2                           | 1                            | 12                               |

**Supplementary Table 2. Causes of death by period**

| <b>Category, Diagnosis</b>          | <b>N, 0-30 Days<br/>(N=16)</b> | <b>N, 31-90 Days<br/>(N=8)</b> | <b>N, 91 Days-1 Year<br/>(N=41)</b> |
|-------------------------------------|--------------------------------|--------------------------------|-------------------------------------|
| Nononcologic                        | 16                             | 8                              | 9                                   |
| Acute respiratory distress syndrome | 3                              | 0                              | 0                                   |
| Arrhythmia/cardiac arrest           | 4                              | 2                              | 3                                   |
| Bronchopleural fistula              | 2                              | 3                              | 0                                   |
| Cerebrovascular accident            | 0                              | 1                              | 1                                   |
| Fall/Intracranial hemorrhage        | 0                              | 1                              | 0                                   |
| Hemorrhage                          | 2                              | 0                              | 0                                   |
| Hypoxic respiratory failure         | 2                              | 1                              | 0                                   |
| Ischemic bowel                      | 1                              | 0                              | 0                                   |
| Other cancer                        | 0                              | 0                              | 1                                   |
| Pneumonia                           | 1                              | 0                              | 3                                   |
| Pulmonary embolus                   | 1                              | 0                              | 0                                   |
| Sepsis                              | 0                              | 0                              | 1                                   |
| Oncologic                           | 0                              | 0                              | 32                                  |
| New primary                         | 0                              | 0                              | 1                                   |
| Recurrence                          | 0                              | 0                              | 31                                  |



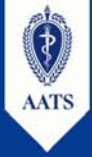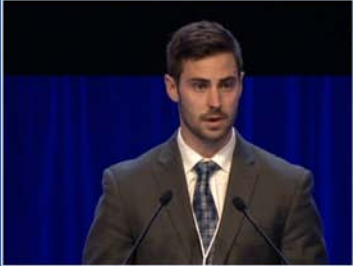

## What Really Happens at 30 and 90 Days After Pneumonectomy?

Gregory D. Jones MD, Raul Caso MD, Kay See Tan PhD,  
Joseph Dycoco, Bernard J. Park MD, Matthew J. Bott MD,  
Daniela Molena MD, James Huang MD, James M. Isbell MD,  
Manjit S. Bains MD, David R. Jones MD, Gaetano Rocco MD

AATS 99<sup>th</sup> Annual Meeting - 5/6/19

**Vision. Leadership. Scholarship.**

Journal Pre

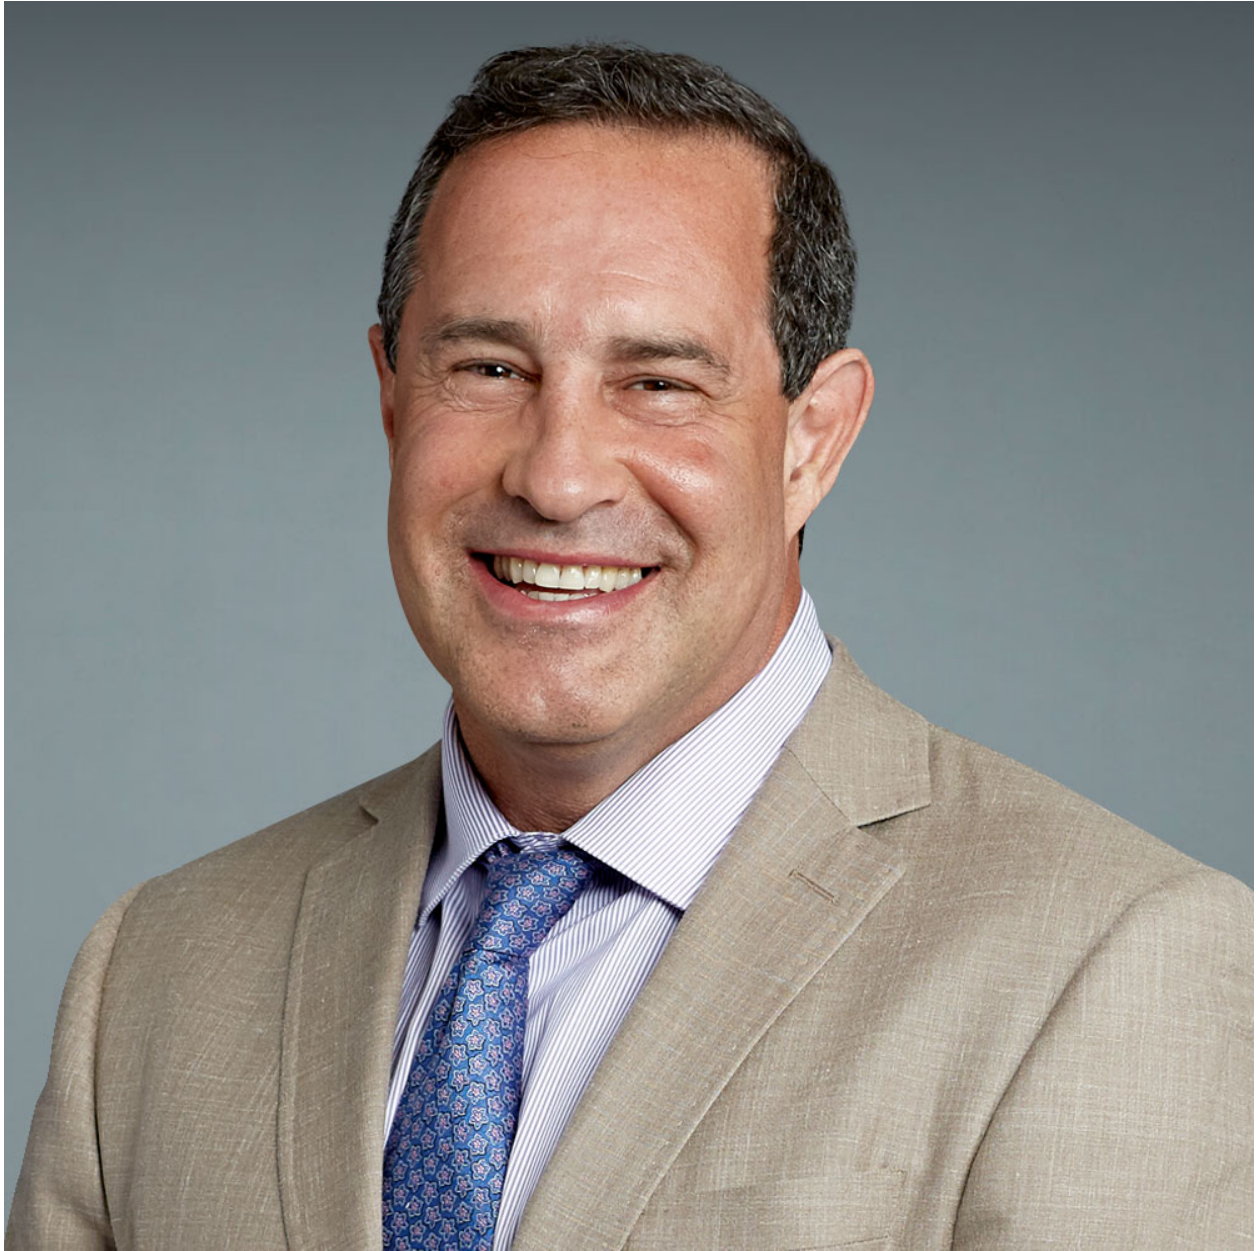

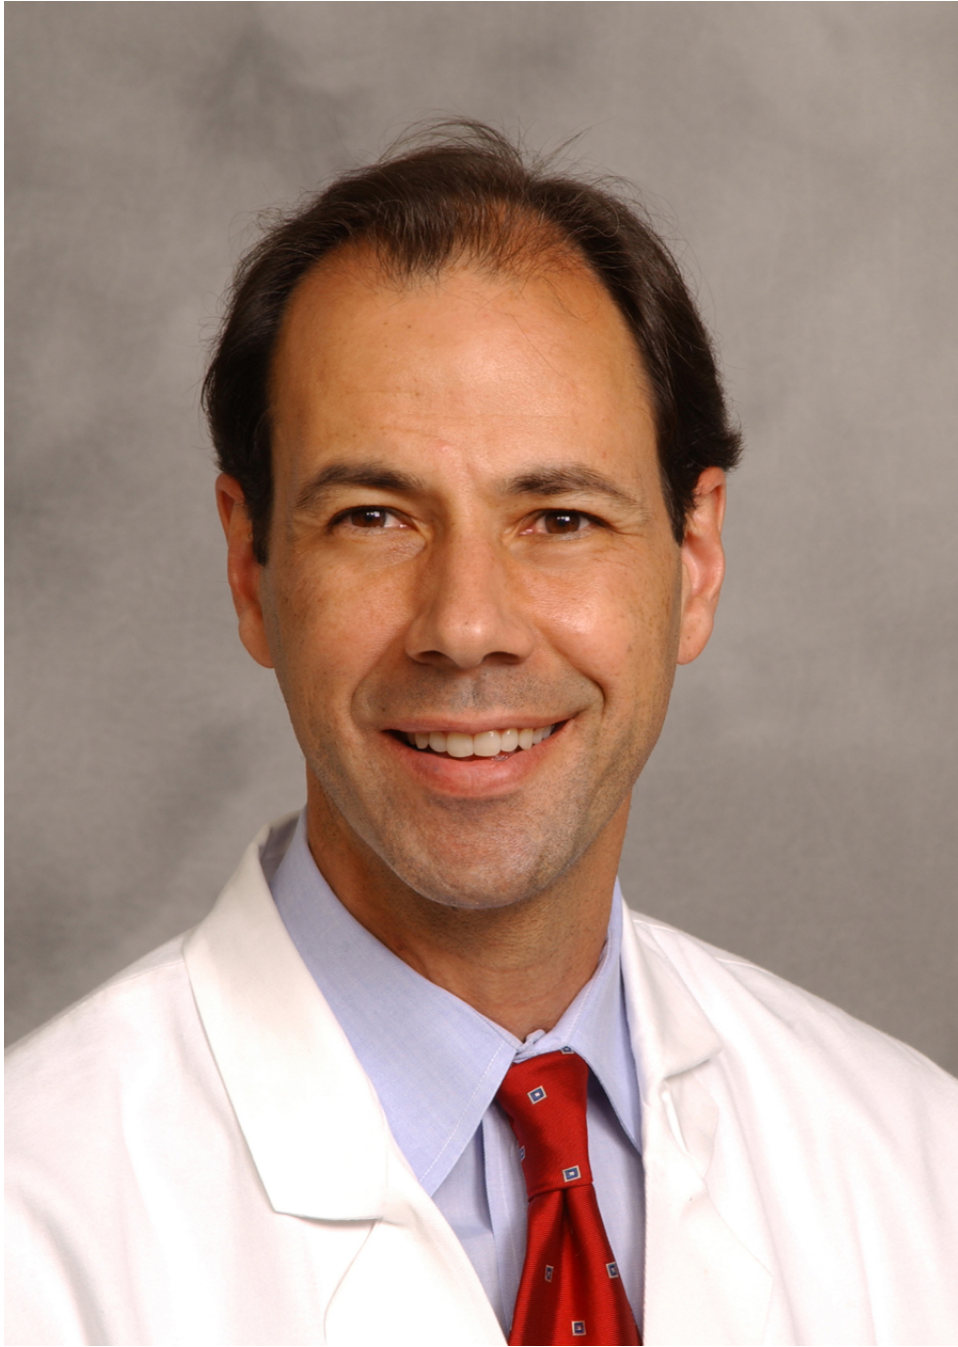

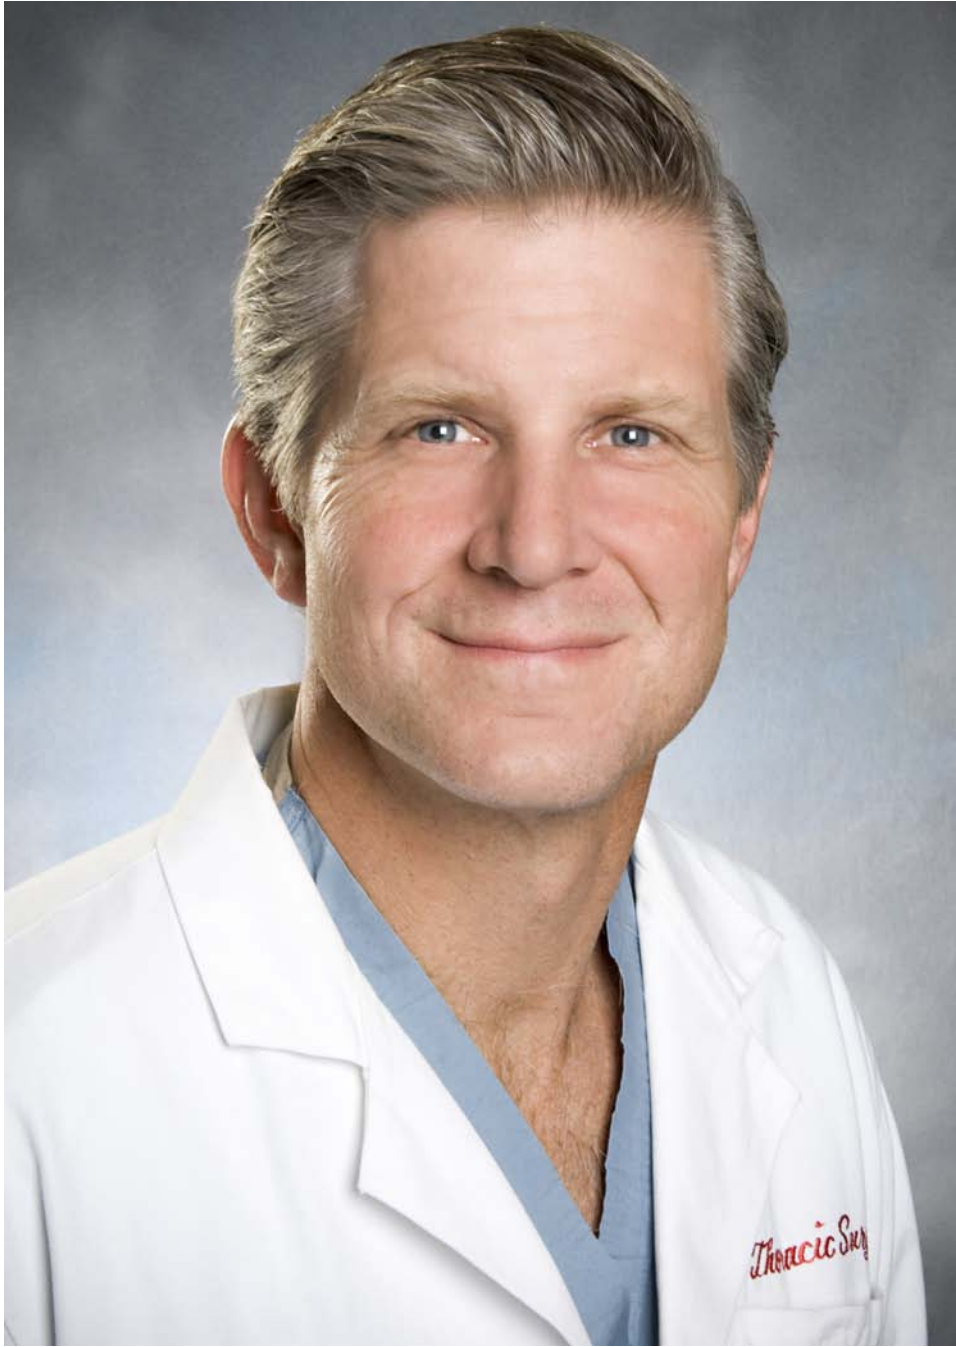

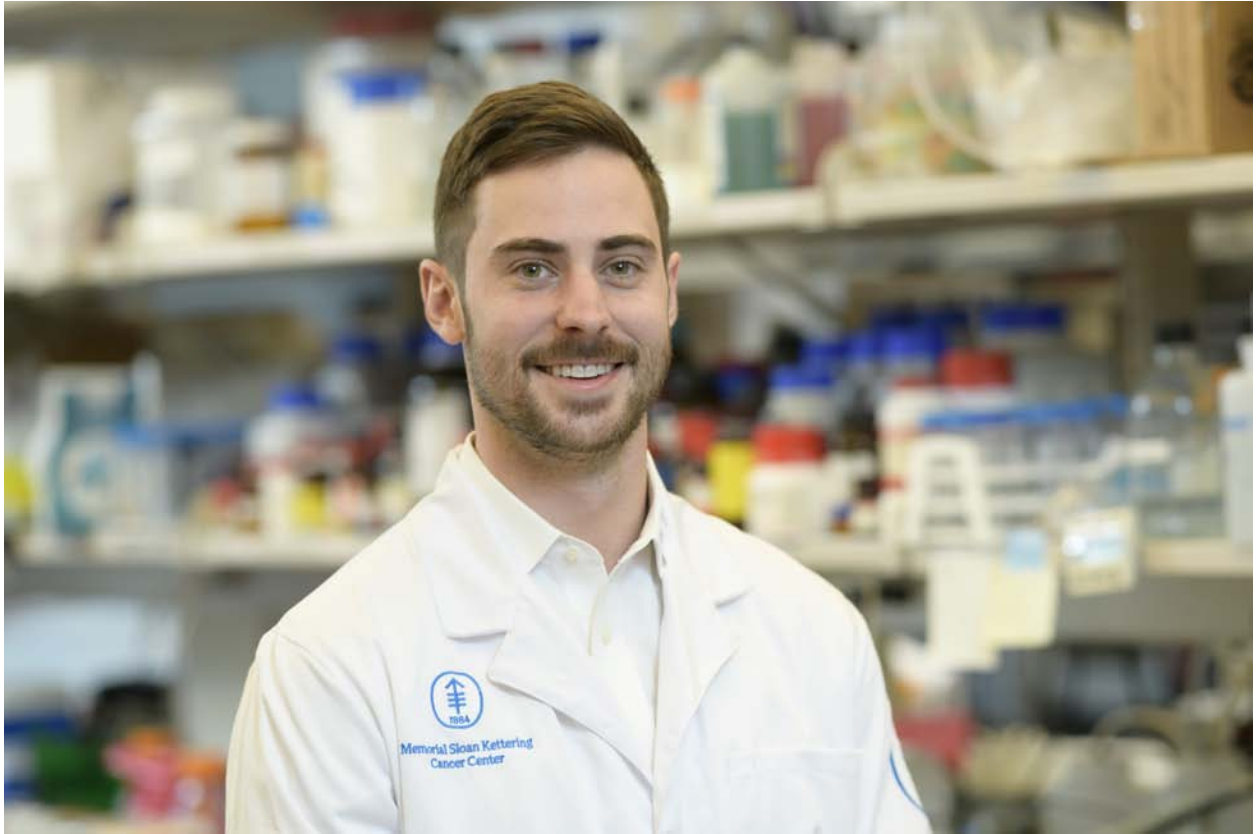

Journal

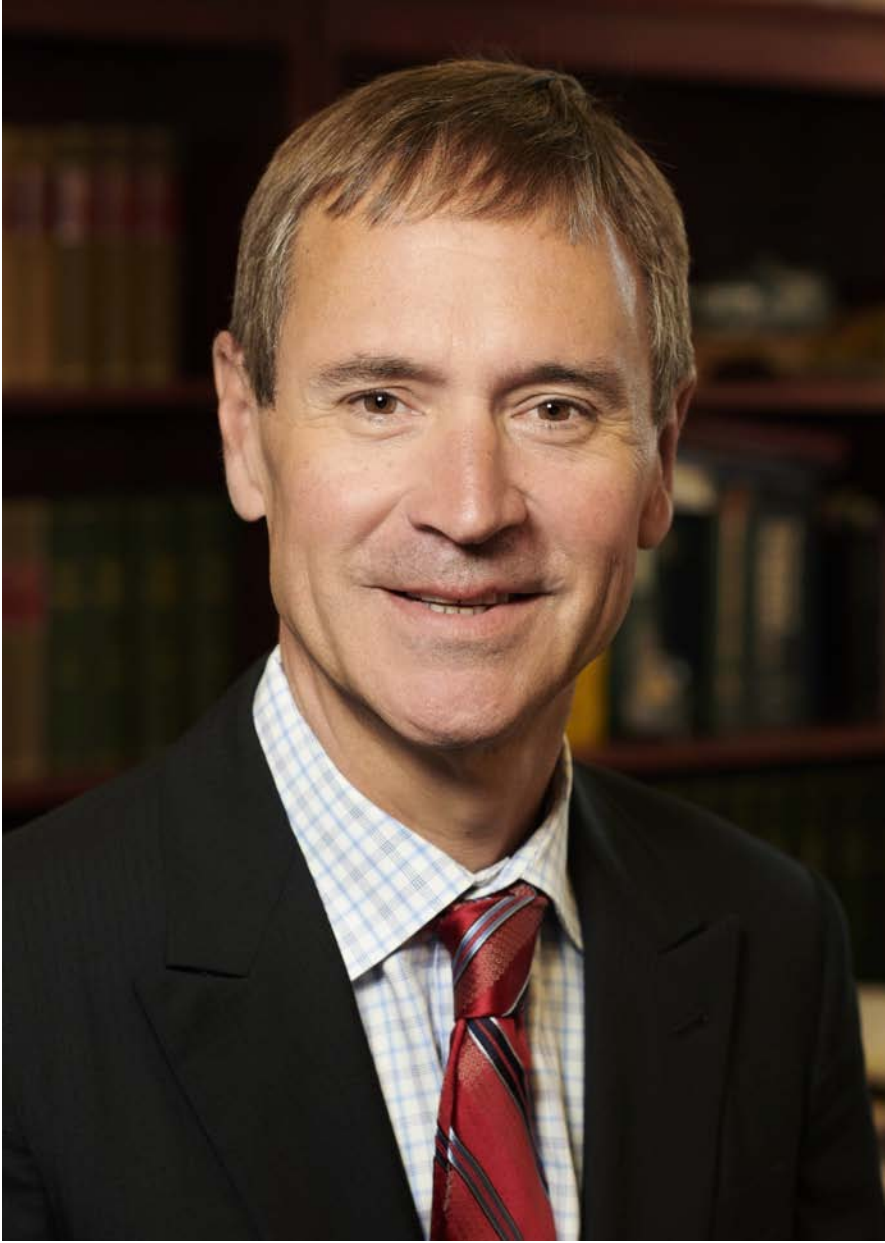

Supplement: NIHMS1581689-supplement-1.pdf [file NIHMS1581689-supplement-1.pdf]
